# Supplementary material
Source: Springer Nature journal article supplement (https://www.springermedizin.de/resource/supplementary/12967_2013_1732_MOESM7_ESM.pdf/9575180)

# SC5b-9 Percent Change from Baseline by Dose and Flow rate of TRO40303 administration

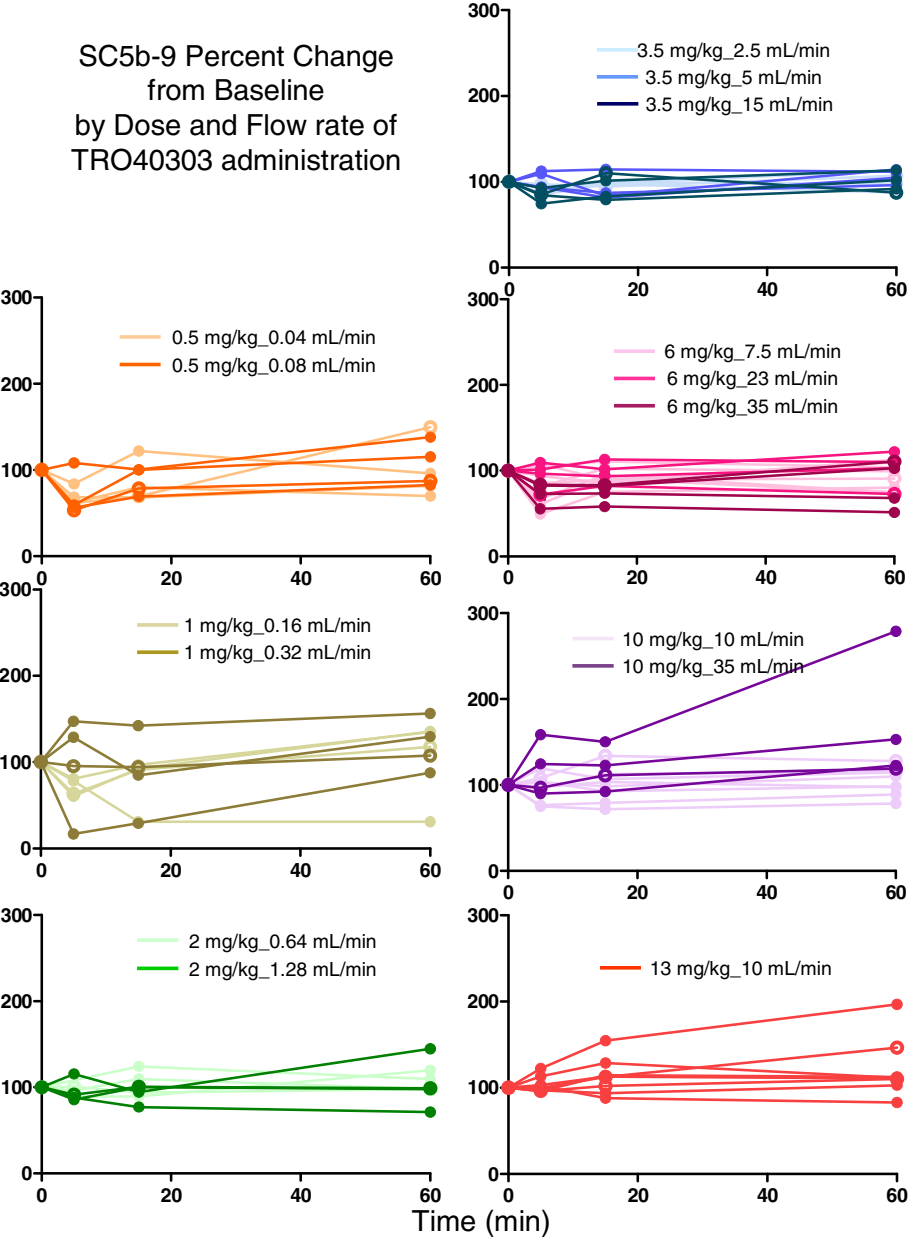

Supplement: MOESM7 [file 9575180]
